# Supplementary material for: Detecting the impacts of humidity, rainfall, temperature, and season on chikungunya, dengue and Zika viruses in Aedes albopictus mosquitoes from selected sites in Cebu city, Philippines
Source: Springer Nature journal article supplement (doi:10.1186/s12985-024-02310-4), 2024-02-15
Supplement: MOESM1 [file 26739538]

1 **Additional file 1: Table S1.** Primer sequences for arboviral detection.

| Primer          | Sequence                            |
|-----------------|-------------------------------------|
| <b>CHIKV</b>    |                                     |
| <i>6K/E1 OA</i> | 5'-AGTCAACAGACCGGGCTACA-3'          |
| <i>6K/E1 OB</i> | 5'-CGCTCAATTGCGTATTTTCA-3'          |
| <i>6K/E1 IA</i> | 5'-GCCCAATGGTACTGGAGATG-3'          |
| <i>6K/E1 IB</i> | 5'-GTGTCGCAGAAGCAGTAGGC-3'          |
| <b>DENV</b>     |                                     |
| <i>D1</i>       | 5'-TCAATATGCTGAAACGCGCGAGAAACCG-3'  |
| <i>D2</i>       | 5'-TTGCACCAACAGTCAATGTCTTCAGGTTC-3' |
| <i>TS1</i>      | 5'-CGTCTCAGTGATCCGGGGG-3'           |
| <i>TS2</i>      | 5'-CGCCACAAGGGCCATGAACAG-3'         |
| <i>TS3</i>      | 5'-TAACATCATCATGAGACAGAGC-3'        |
| <i>TS4</i>      | 5'-CTCTGTTGTCTTAAACAAGAGA-3'        |
| <b>ZIKV</b>     |                                     |
| <i>ZIKV F</i>   | 5'CCTTGGATTCTTGAACGAGGA-3'          |
| <i>ZIKV R</i>   | 5'-AGAGCTTCATTCTCCAGATCAA-3'        |
