# Supplementary material for: Detecting the impacts of humidity, rainfall, temperature, and season on chikungunya, dengue and Zika viruses in Aedes albopictus mosquitoes from selected sites in Cebu city, Philippines
Source: Springer Nature journal article supplement (doi:10.1186/s12985-024-02310-4), 2024-02-15
Supplement: MOESM3 [file 26739538]

1 **Additional file 32: Table S2.** Dengue cases in Cebu city, Philippines in dry (March-May 2021  
2 and March-May 2022) and wet seasons (June-November 2021; February and June 2022).

| Season          | Month     | Dengue cases |
|-----------------|-----------|--------------|
| Dry Season 2021 | March     | 15           |
|                 | April     | 10           |
|                 | May       | 19           |
| Wet Season 2021 | June      | 33           |
|                 | July      | 82           |
|                 | August    | 35           |
|                 | September | 20           |
|                 | October   | 45           |
|                 | November  | 76           |
| Dry Season 2022 | March     | 217          |
|                 | April     | 272          |
|                 | May       | 427          |
| Wet Season 2022 | February  | 177          |
|                 | June      | 562          |

3
